# Supplementary material
Source: publisher site journal article supplement (https://www.dovepress.com/article/589288)
Supplement: Supplementary file 1 [file 589288%20Revised%20Supplementary%20file.docx]

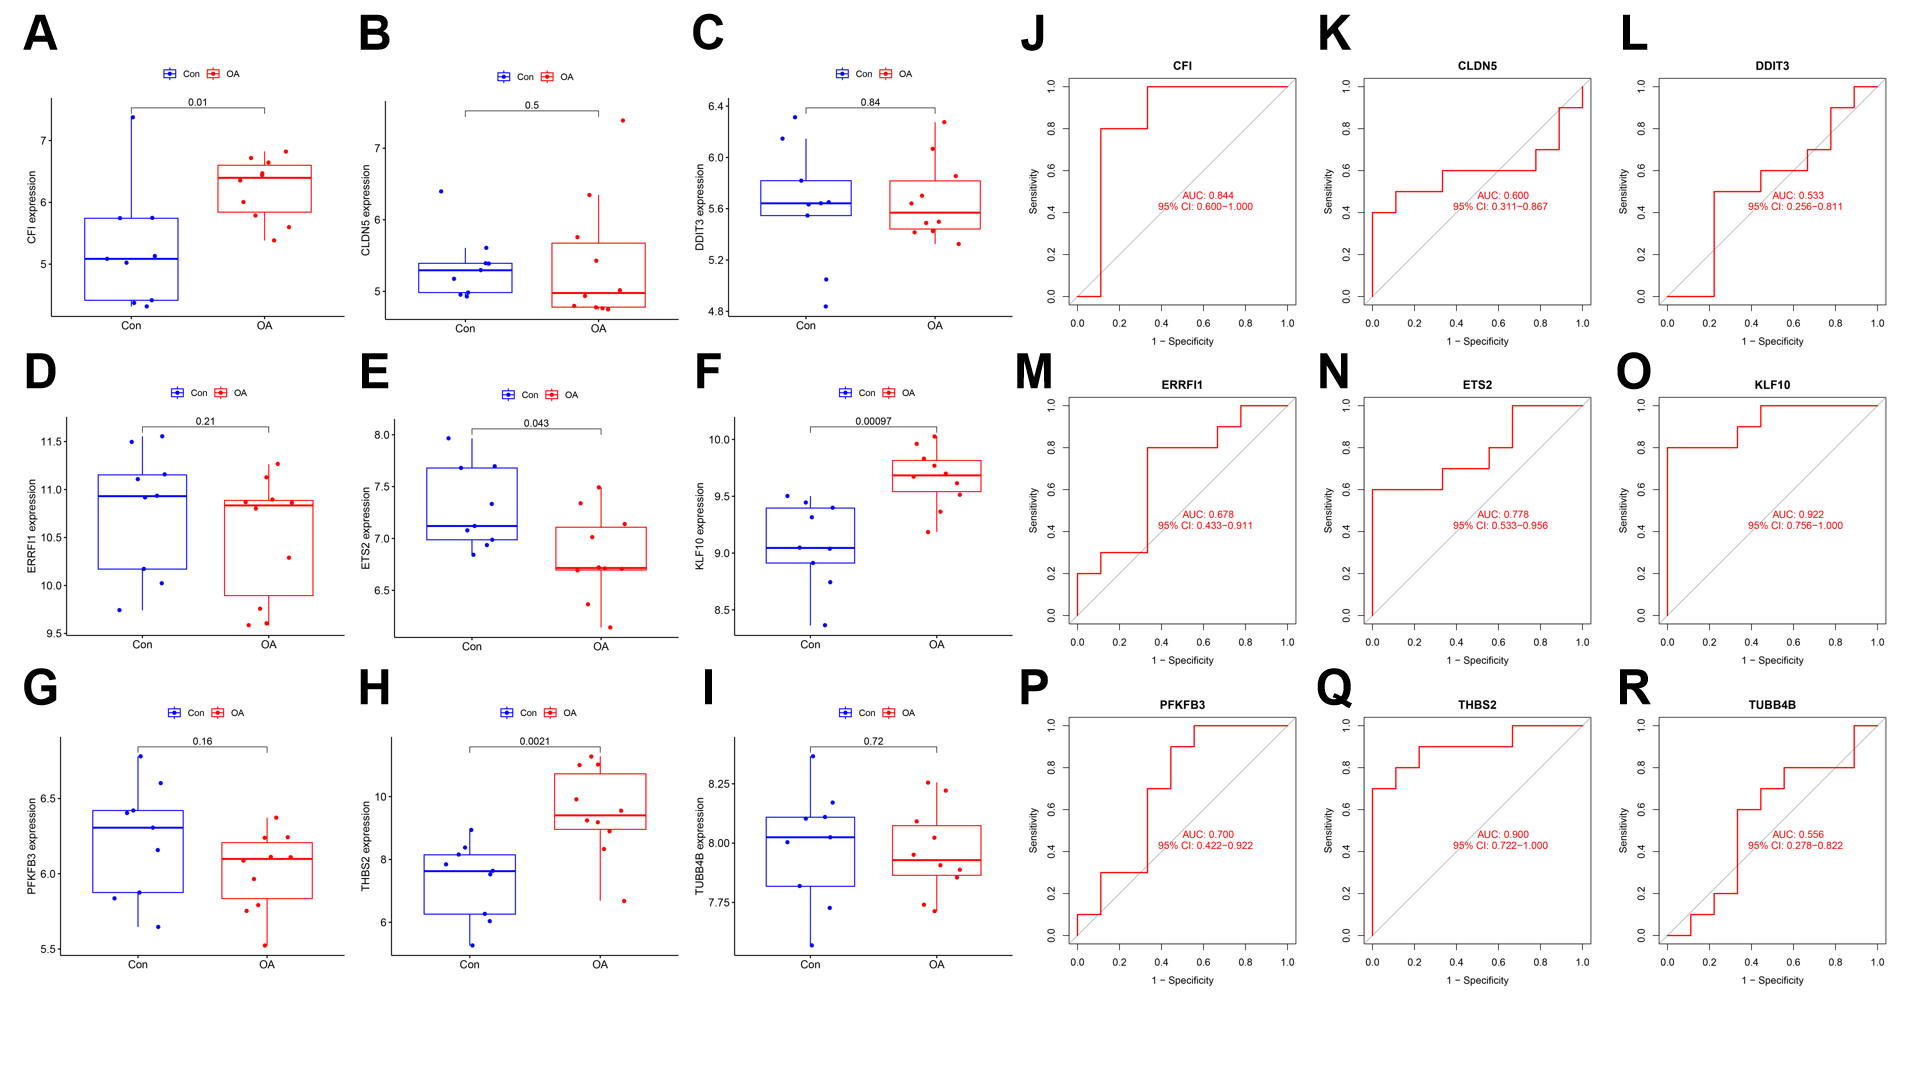


**Fig. S1** **Expression and prediction analysis of 9 genes in GSE129147**

(**A–I**) The expression of signature genes between the OA and healthy cohort. (**J–R**) ROC showed the diagnostic performance of the signature genes.


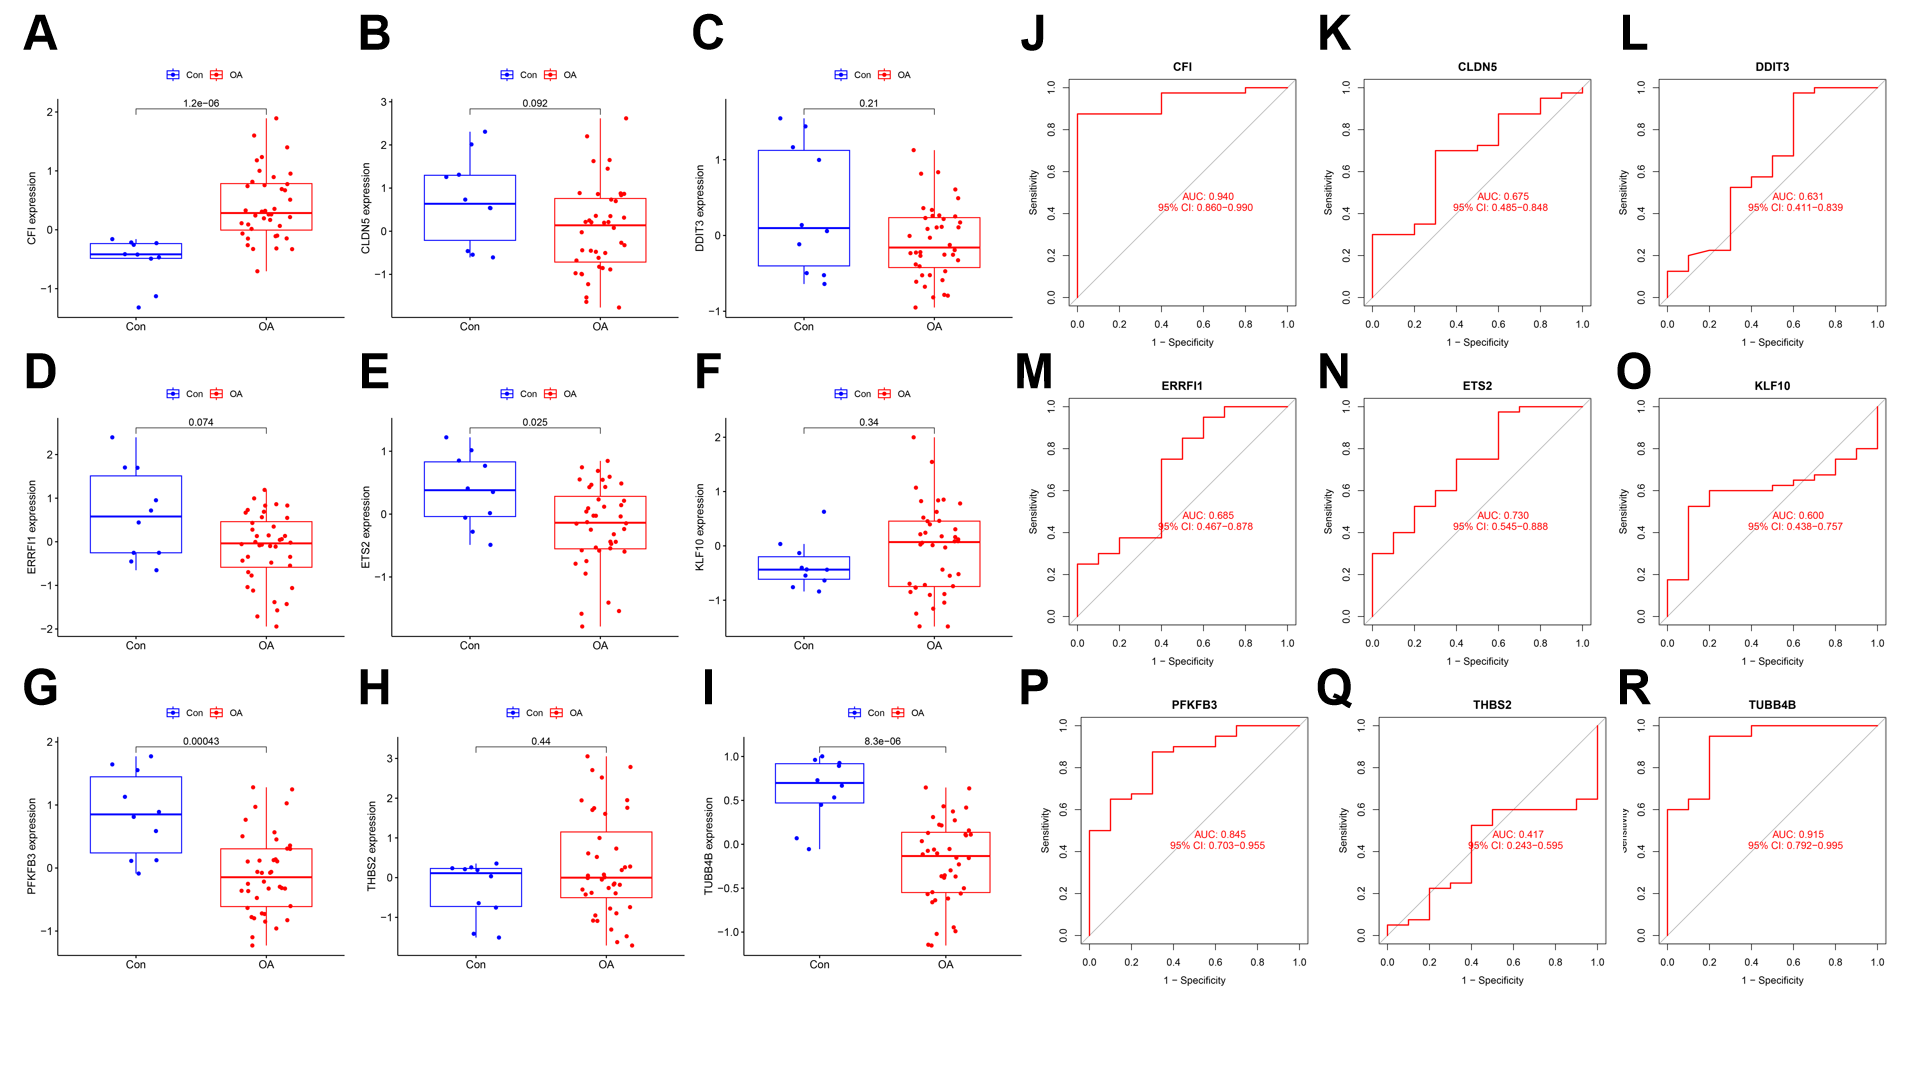


**Fig. S2** **Expression and prediction analysis of 9 genes in GSE51588**

(**A–I**) The expression of signature genes between the OA and healthy cohort. (**J–R**) ROC showed the diagnostic performance of the signature genes.


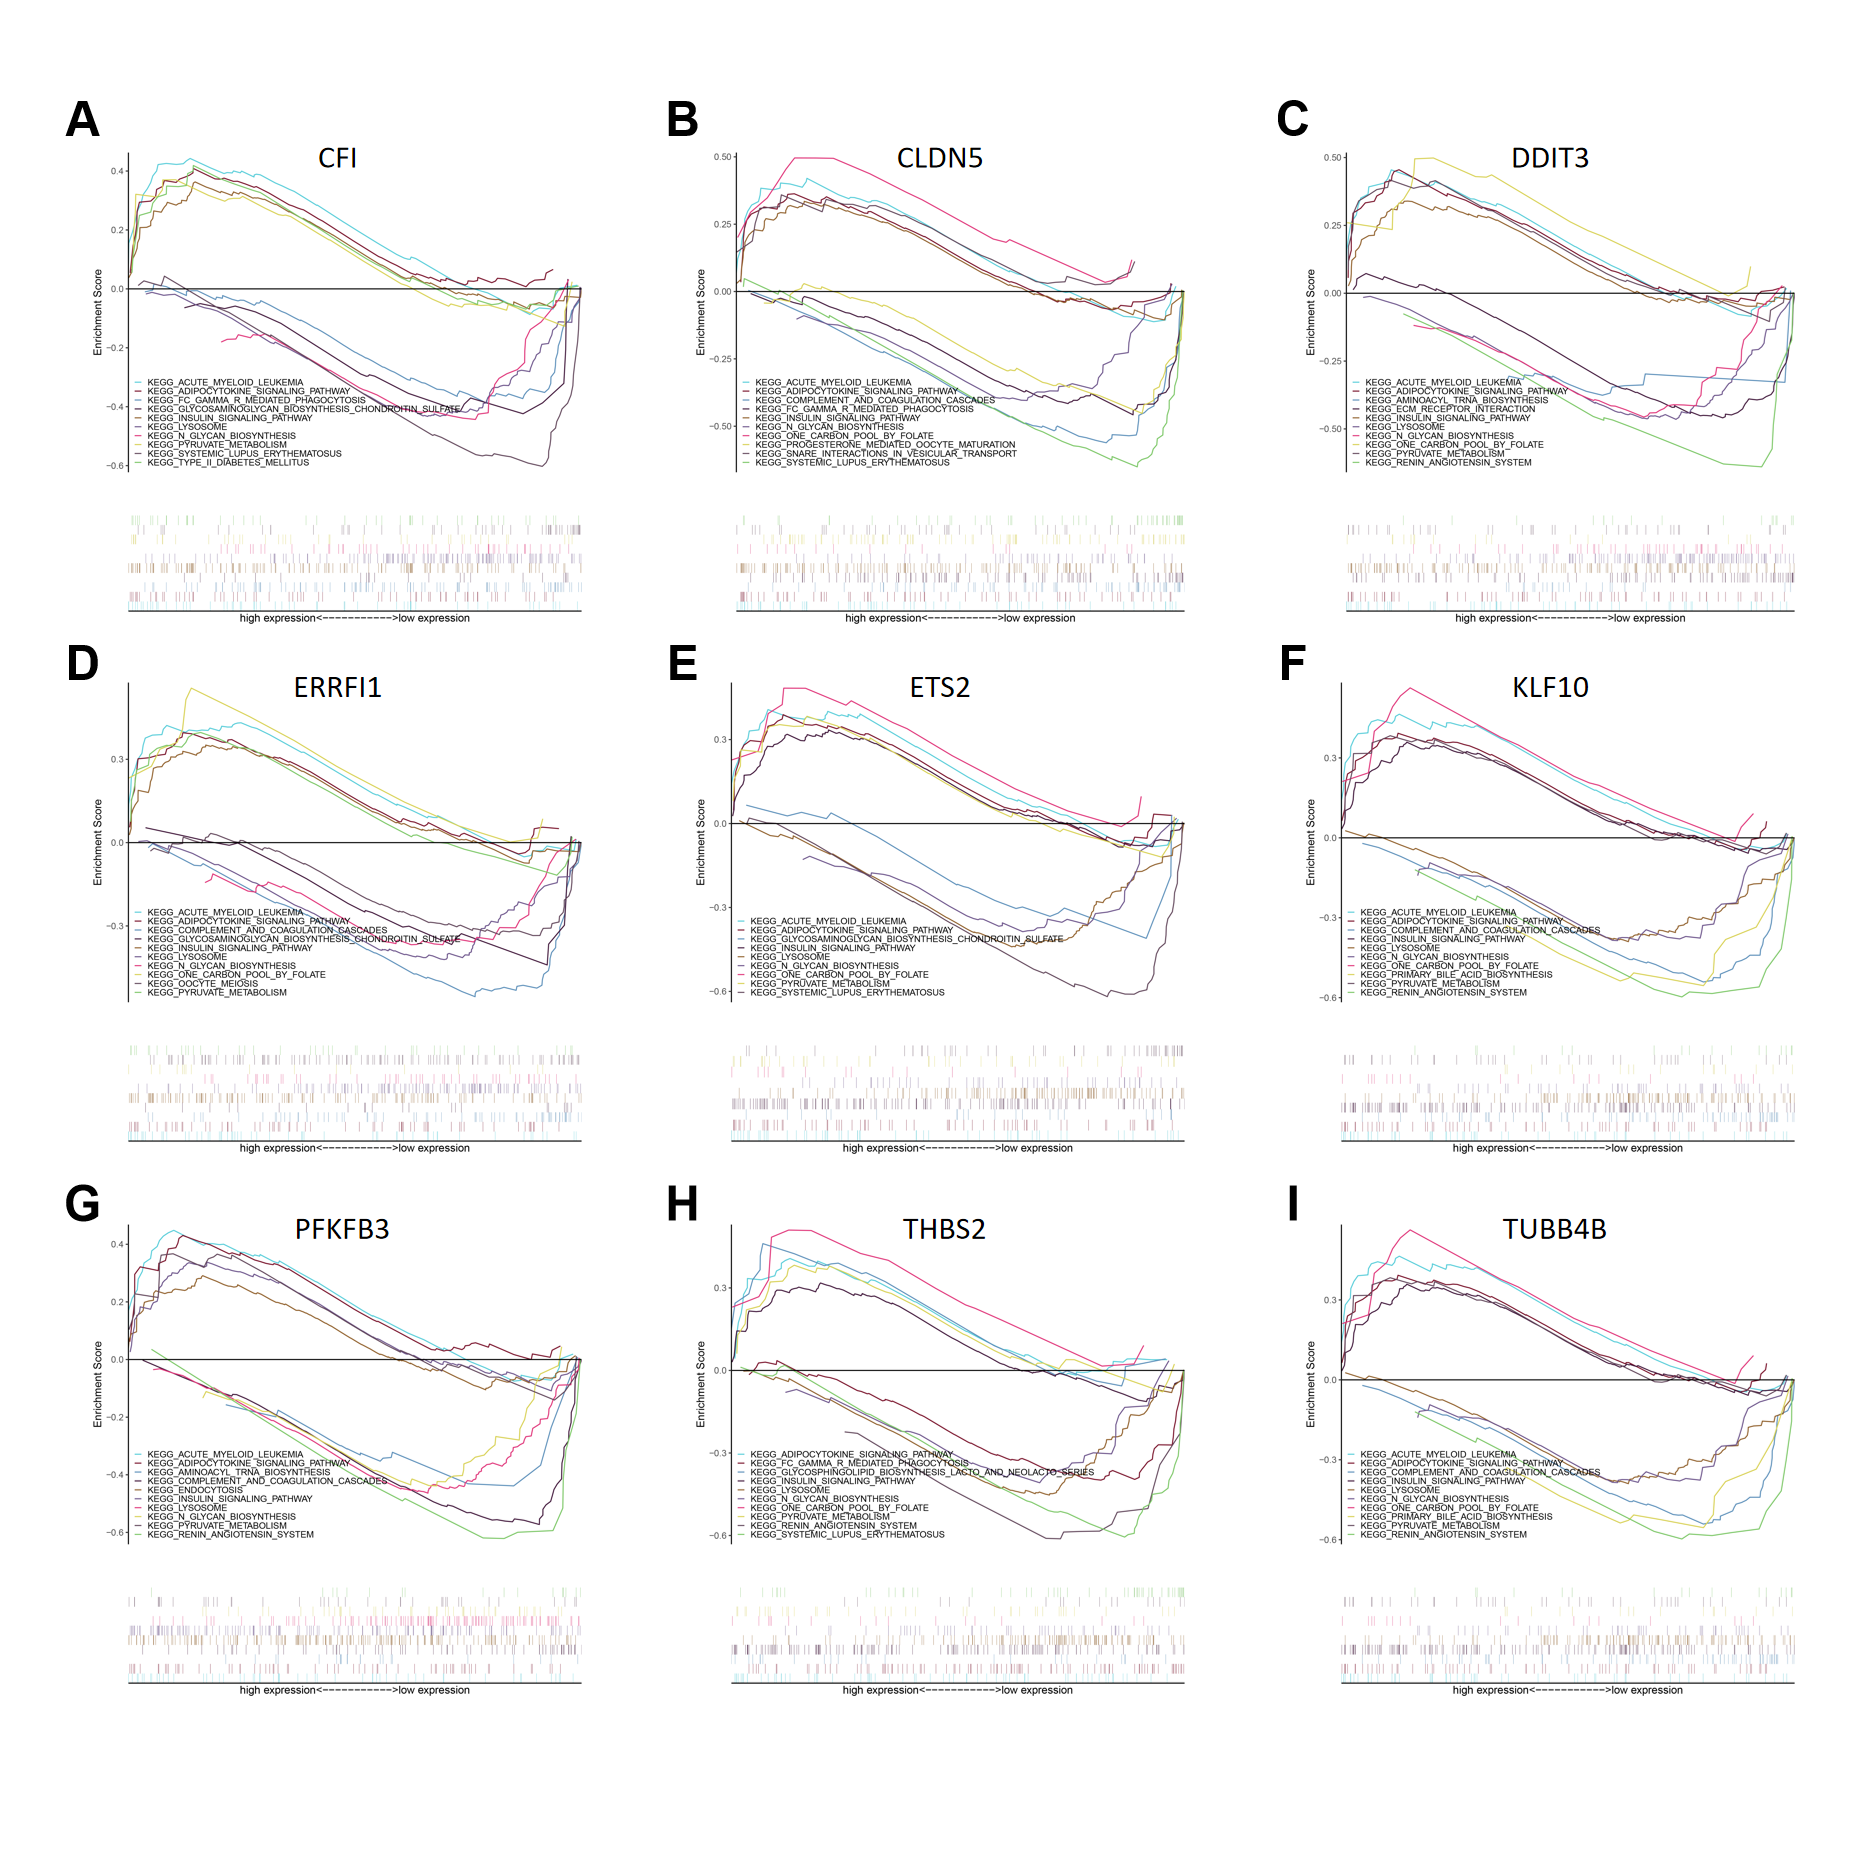


**Fig. S3** **The GSEA of the signature genes in OA**

(**A-I**) The GSEA of CFI, CLDN5, DDIT3, ERRFI1, ETS2, KLF10, PFKFB3, THBS2, and TUBB4B in OA.


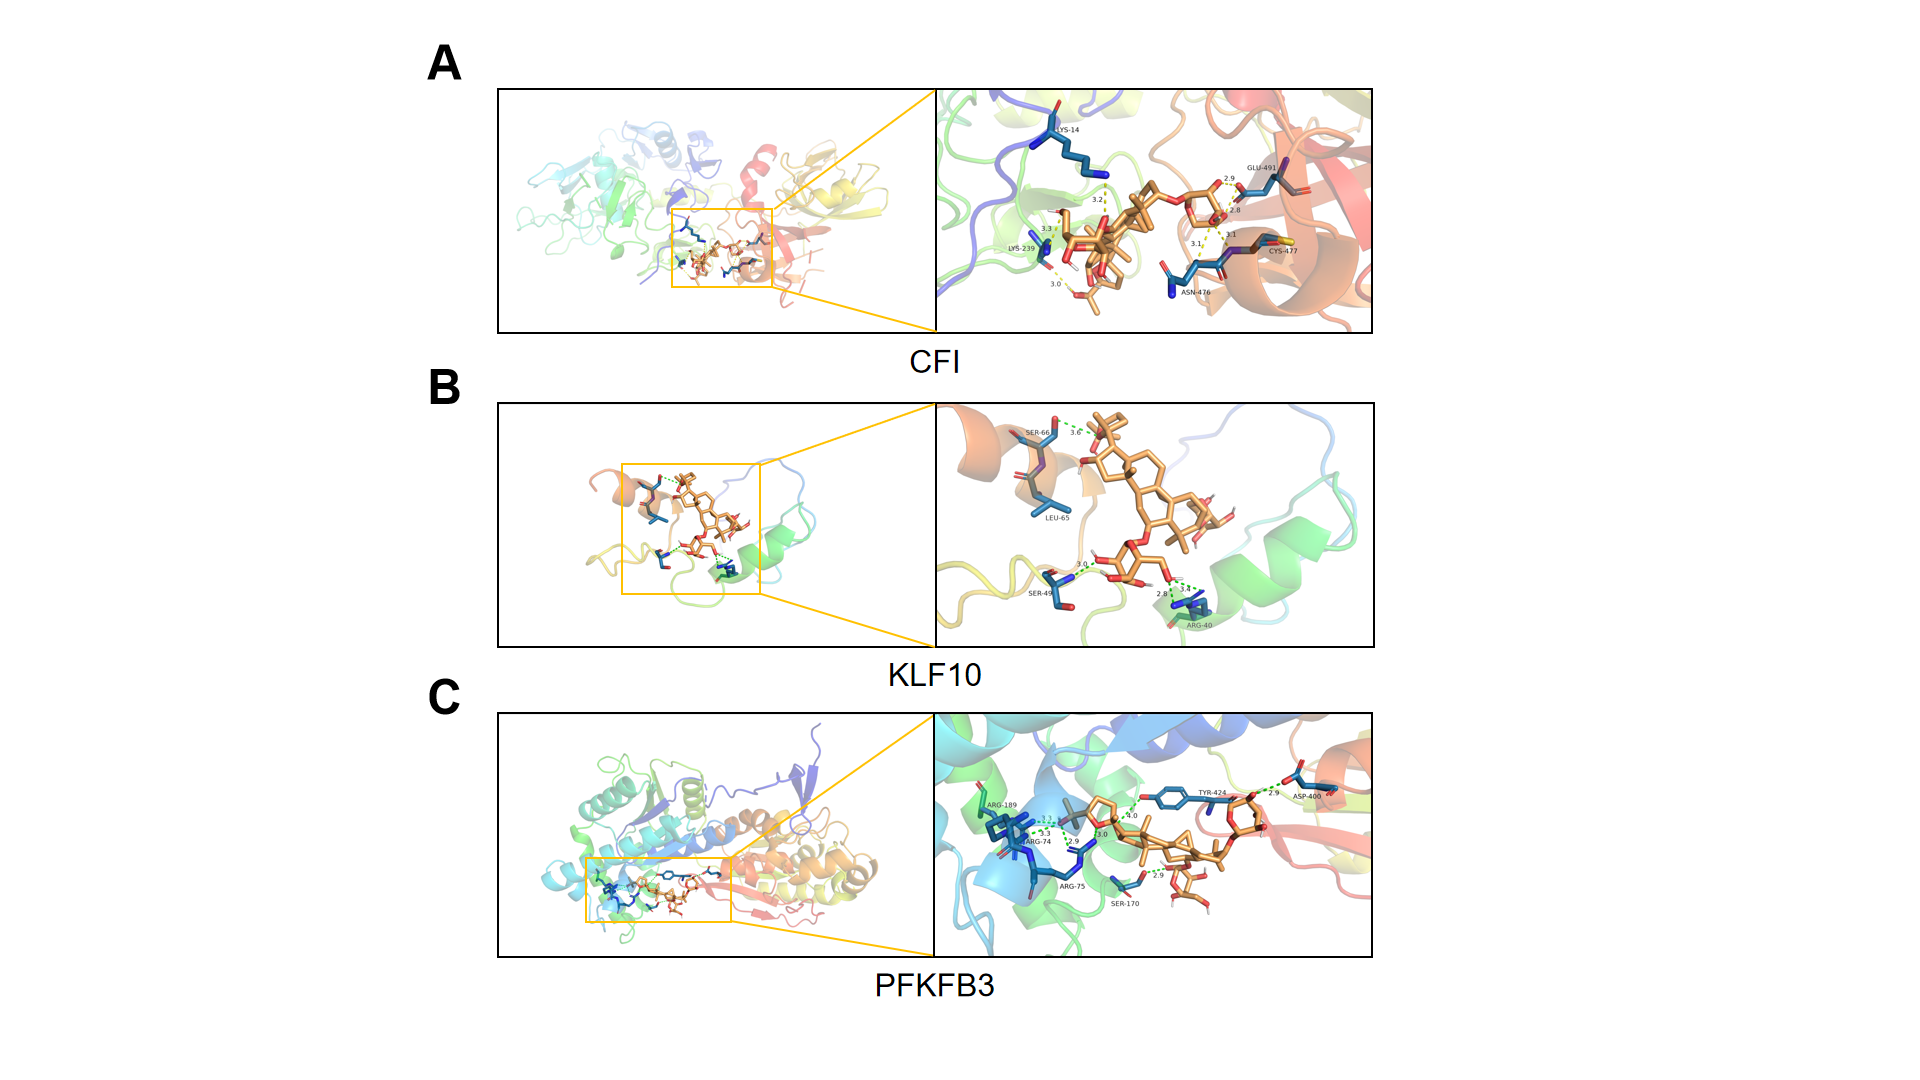


**Fig. S4** **Representative molecular docking**

(**A**) Astragaloside IV(AS-IV) binding with CFI. (**B**) AS-IV binding with KLF10. (**C**) AS-IV binding with PFKFB3.
